# Supplementary material for: Exploring a ferroptosis and oxidative stress-based prognostic model for clear cell renal cell carcinoma
Source: PubMed Central journal article supplement (PMC10098013; doi:10.3389/fonc.2023.1131473), 2023-03-30
Supplement: Image_1.pdf [file Image_1.pdf]

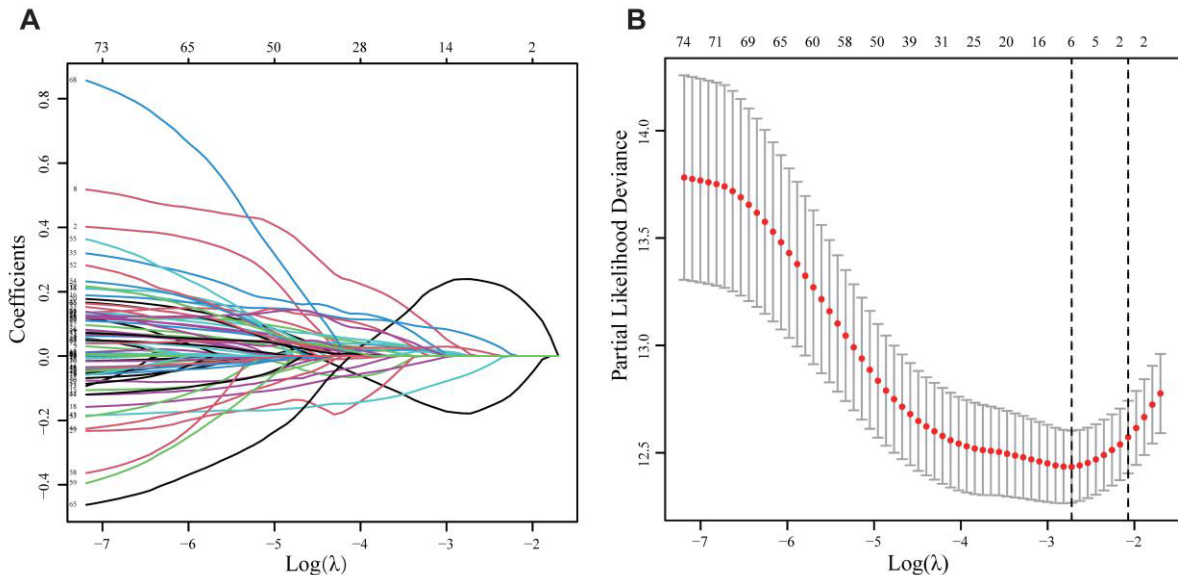

**Supplemental Figure 1.** Identifying crucial prognosis-related FPTOSs using LASSO regression analysis. **(A)** Trajectory variation of the independent variable coefficients. **(B)** The cross validation results of model construction.
