# Supplementary material for: Exploring a ferroptosis and oxidative stress-based prognostic model for clear cell renal cell carcinoma
Source: PubMed Central journal article supplement (PMC10098013; doi:10.3389/fonc.2023.1131473), 2023-03-30
Supplement: Image_2.pdf [file Image_2.pdf]

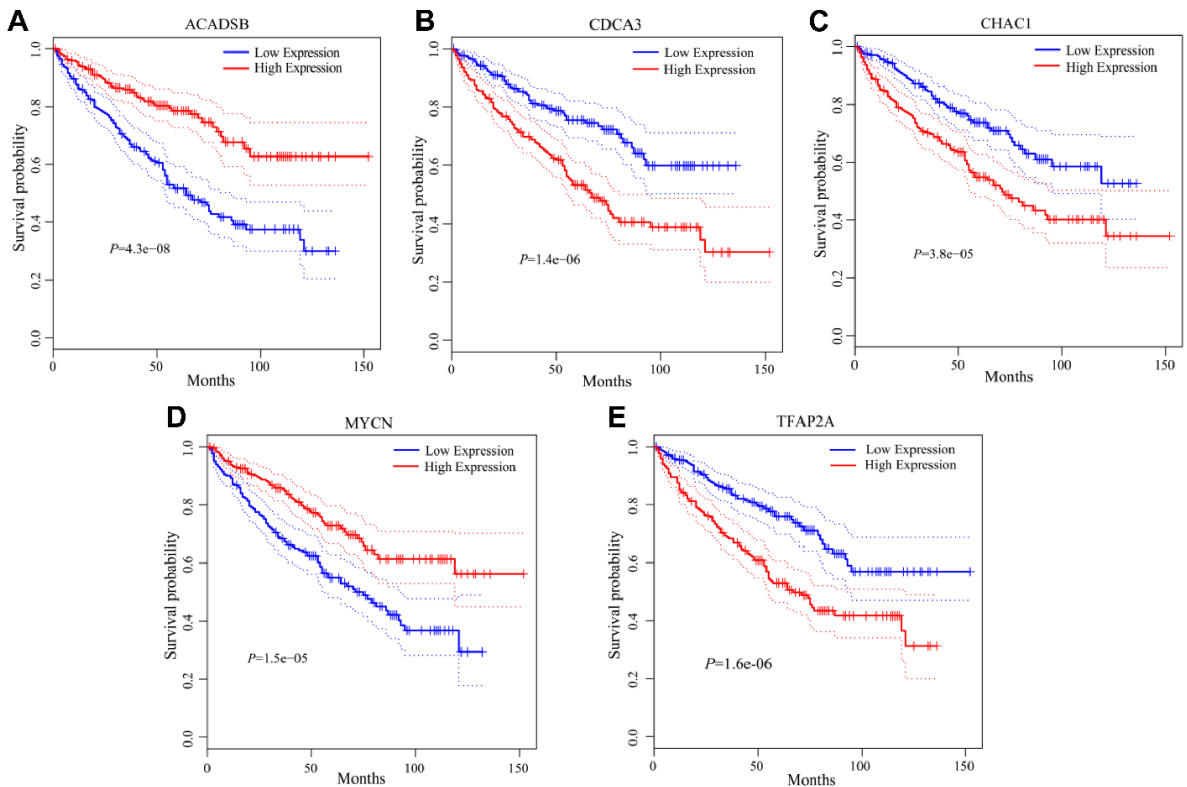

**Supplemental Figure 2.** Evaluating the prognostic values of the identified FPTOSs in ccRCC patients based on the GEPIA database. Kaplan-Meier survival analyses stratified by the relative expression of **(A)** *ACADSB*, **(B)** *CDCA3*, **(C)** *CHAC1*, **(D)** *MYCN*, **(E)** *TFAP2A*. The results indicated *ACADSB* and *MYCN* could serve as the favorable prognostic marker for ccRCC patients, while *CDCA3*, *CHAC1*, and *TFAP2A* could serve as the unfavorable prognostic marker for ccRCC patients. All data are available from the GEPIA database (<http://gepia.cancer-pku.cn/index.html>).
