# Supplementary material for: Exploring a ferroptosis and oxidative stress-based prognostic model for clear cell renal cell carcinoma
Source: PubMed Central journal article supplement (PMC10098013; doi:10.3389/fonc.2023.1131473), 2023-03-30
Supplement: Image_3.pdf [file Image_3.pdf]

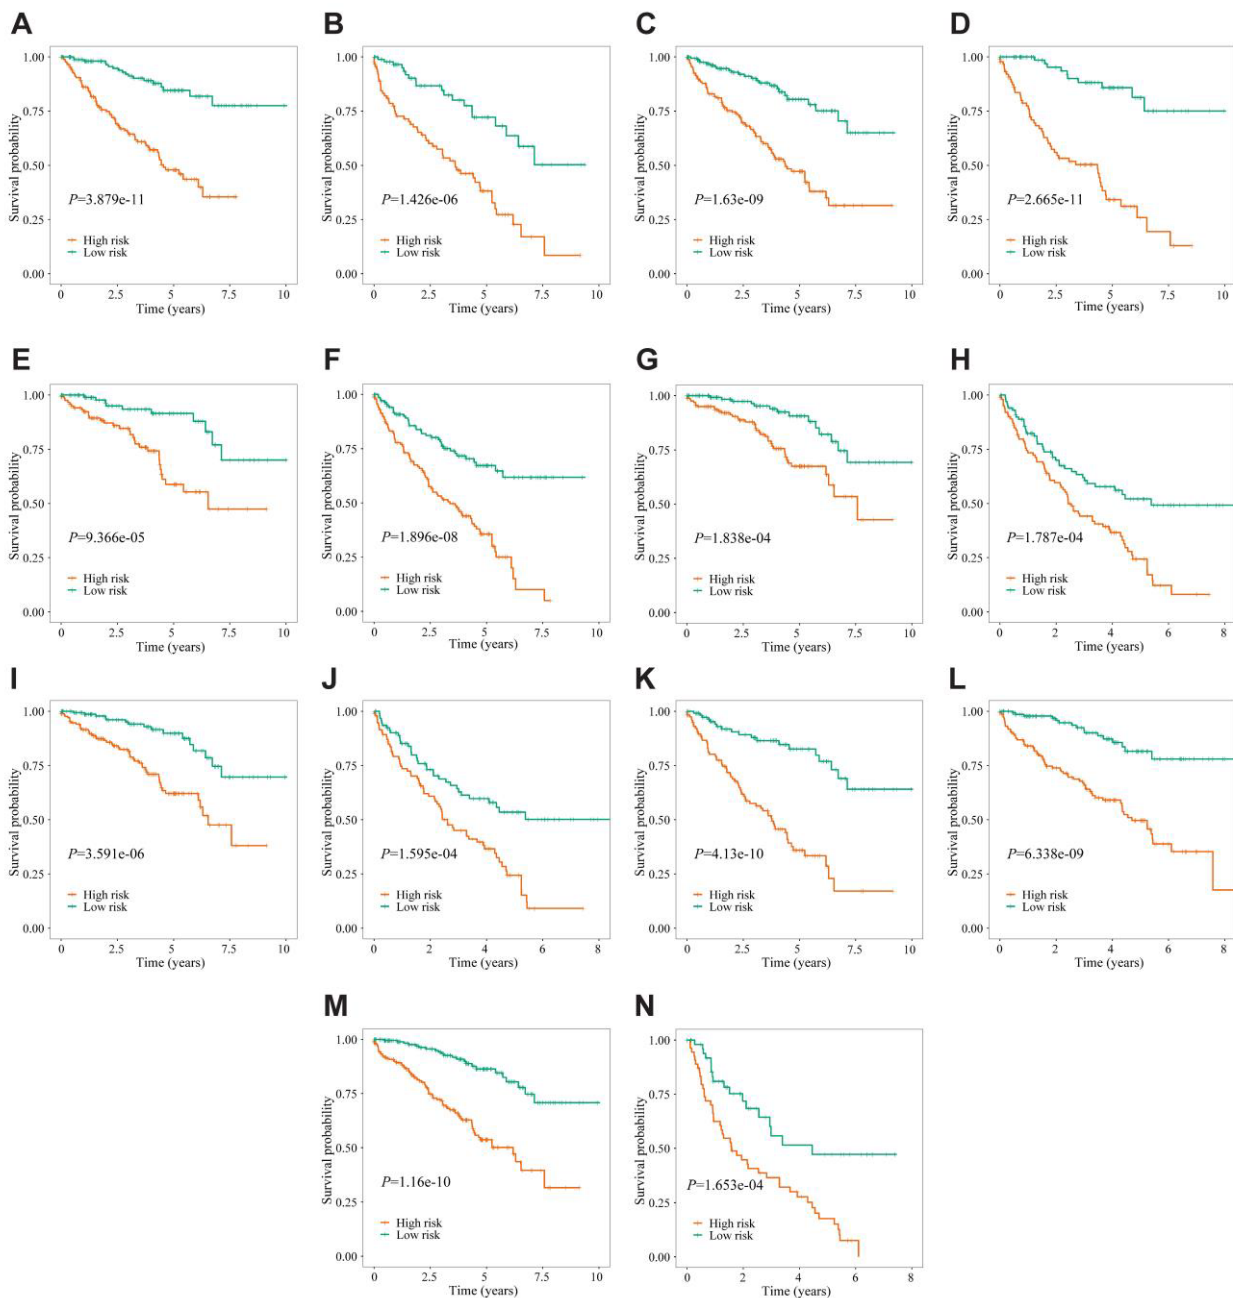

**Supplemental Figure 3.** Prognostic value of the FPTOS gene signature stratified by various clinical parameters. (A) age  $\leq$  65, (B) age  $>$  65, (C) male, (D) female, (E) grade 1-2, (F) grade 3-4, (G) stage I-II, (H) stage III-IV, (I) T1-2, (J) T3-4, (K) N0, (L) N1-x, (M) M0, (N) M1-x. Log-rank test was applied to compare the statistical differences.
